# Supplementary material
Source: publisher site journal article supplement (https://www.degruyterbrill.com/publication/isbn/9783050047423/downloadAsset/9783050047423_Buchinformation.pdf)
Supplement: Supplementary file 1 [file 9783050047423_Buchinformation.pdf]

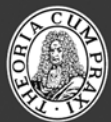

# Akademie Verlag

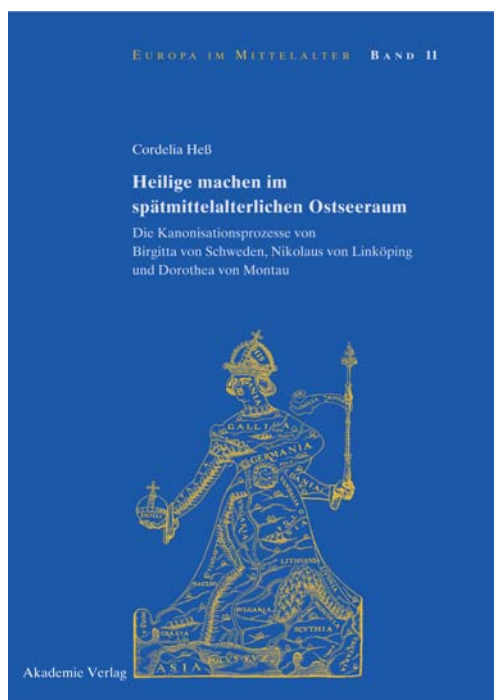

Cordelia Heß

## Heilige machen im spätmittelalterlichen Ostseeraum

Die Kanonisationsprozesse von Brigitta von Schweden, Nikolaus von Linköping und Dorothea von Montau

*Europa im Mittelalter. Abhandlungen und Beiträge zur historischen Komparatistik, Band 11*

2008. 395 S. – 170 x 240 mm, Festeinband, € 69,80  
ISBN 978-3-05-004514-6

Eine adlige Witwe, die den Papst aus Avignon zurückholen will, ein tapferer Streiter für die Freiheit der Kirche und eine demütig fastende Rekluse – die Heiligen des spätmittelalterlichen Ostseeraums weisen die ganze Bandbreite möglicher Heiligkeitsideale auf, und dennoch ähneln sich ihre Kanonisationsprozesse sehr.

Die vorliegende Arbeit untersucht erstmals nicht nur die Kanonisationsprozesse, sondern bindet sie darüber hinaus in ihren jeweiligen Überlieferungszusammenhang ein. Durch den Vergleich älterer Vorlagen und jüngerer Bearbeitungen mit den Akten selbst gelingt es, die inhaltliche Normierung der Kanonisationsprozesse nachzuvollziehen. Viten, Wunderberichte und Zeugenaussagen werden dabei gleichermaßen als Beiträge zur Konstruktion des Heiligkeitsideals gewertet, das für die offizielle Heiligsprechung opportun erschien, sich aber deutlich von den regional propagierten Idealen unterschied. Dass das Wissen hierüber bei den Klerikern in Vadstena, Linköping und Marienwerder vorhanden war, ist gleichzeitig ein Hinweis auf die Bedeutung der Heiligenverehrung für die Einbindung der Peripherie in den Kulturraum des christlichen Europa.
